# Supplementary figures and images for: Modulation of Endocannabinoids by Caloric Restriction is Conserved in Mice but is not Required for the Protection from Acute Kidney Injury
Source: Preprints.org preprint supplement (doi:10.20944/preprints202105.0067.v1), 2021-05-05

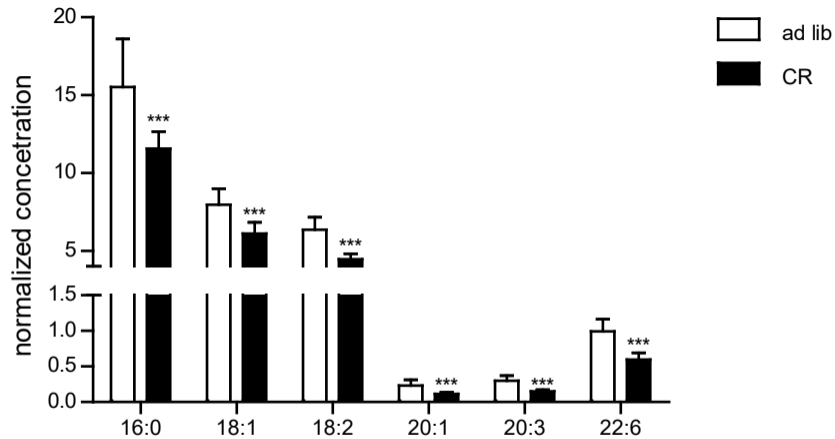

Fig. S1

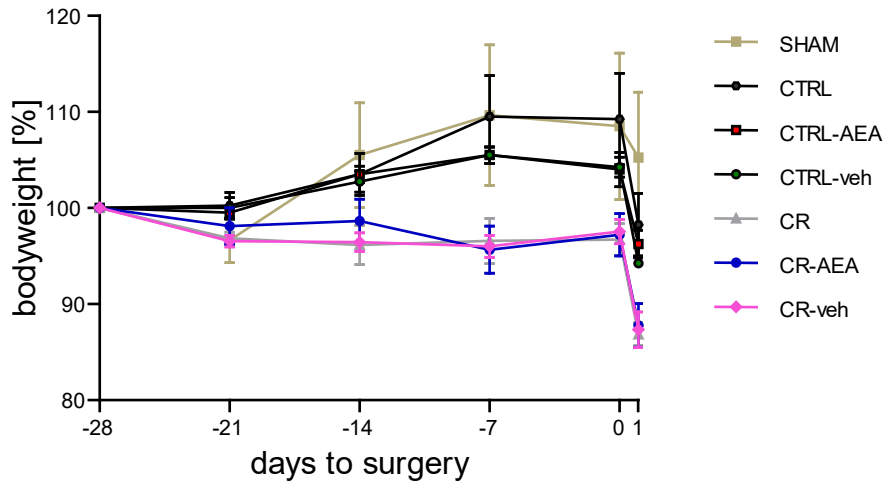

Fig. S2

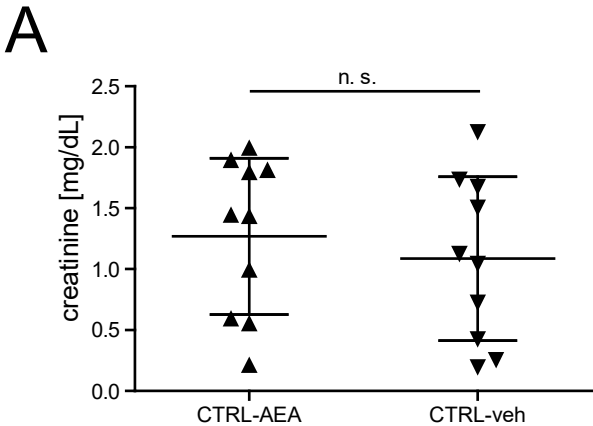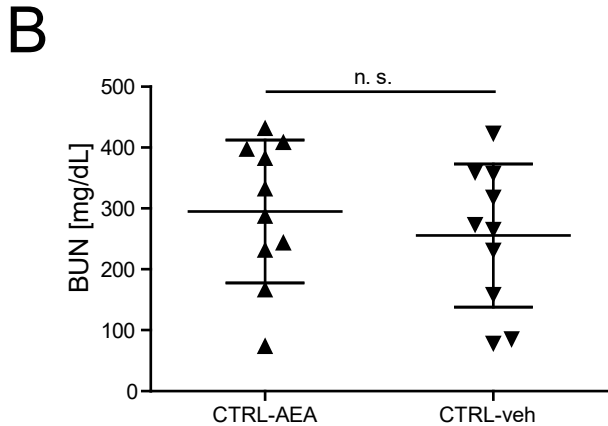

Fig. S3

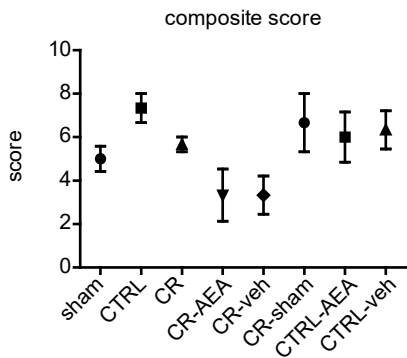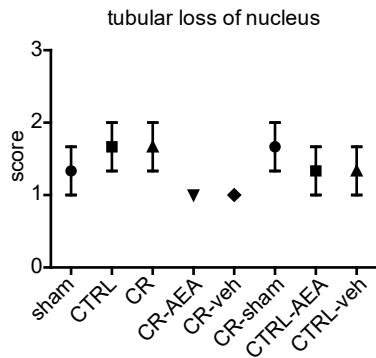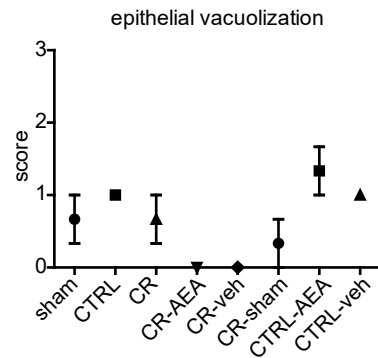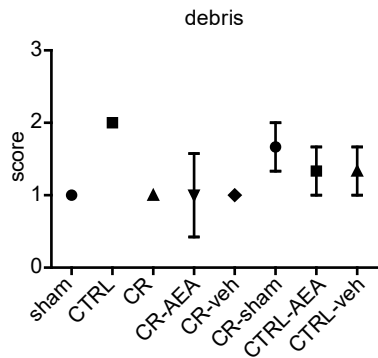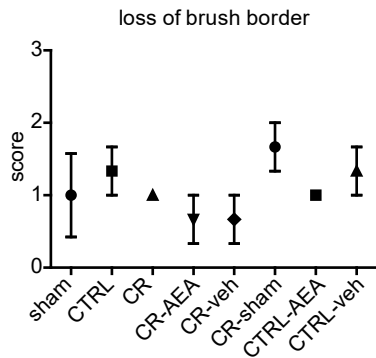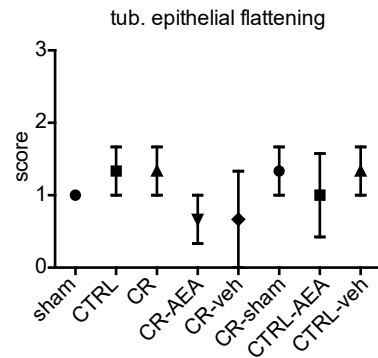

Fig. S4

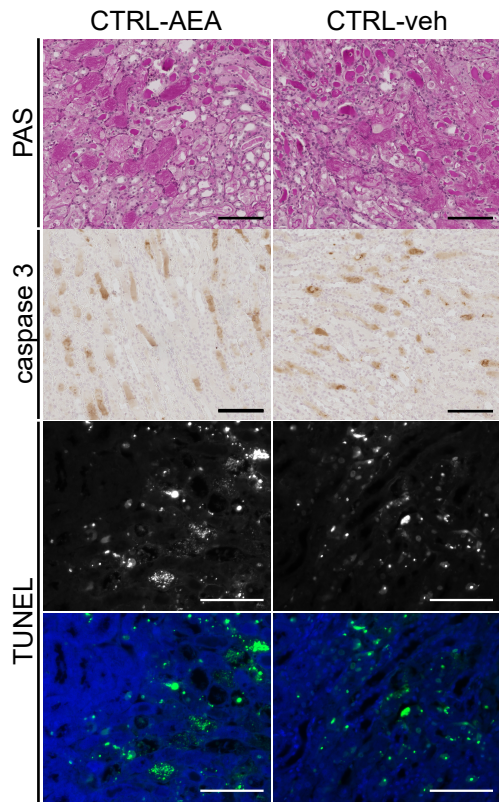

Fig. S5

Supplement: Supplementary file 1 [file supplementary]
